# Supplementary material
Source: PubMed Central journal article supplement (PMC10233292)
Supplement: awac107_supplementary_data.pdf [file awac107_supplementary_data.pdf]

**Supplementary Table 1:** 148 genes associated with change in WMH volume over time

| <b>Symbol</b> | <b>Entrez Gene Name</b>                                          | <b>p-value</b> | <b>Partial<br/>Corr<br/>%WMH<br/>change</b> |
|---------------|------------------------------------------------------------------|----------------|---------------------------------------------|
| ABHD12B       | abhydrolase domain containing 12B                                | 0.00961        | -0.202                                      |
| ABHD16A       | abhydrolase domain containing 16A, phospholipase                 | 0.00649        | -0.212                                      |
| ABT1          | activator of basal transcription 1                               | 0.00651        | -0.212                                      |
| ACTA1         | actin alpha 1, skeletal muscle                                   | 0.00913        | 0.203                                       |
| ADAM8         | ADAM metalloproteinase domain 8                                  | 0.00888        | -0.204                                      |
| ADCK1         | aarF domain containing kinase 1                                  | 0.000877       | 0.257                                       |
| AMACR         | alpha-methylacyl-CoA racemase                                    | 0.00935        | -0.202                                      |
| ANKDD1A       | ankyrin repeat and death domain containing 1A                    | 0.000299       | -0.279                                      |
| ANLN          | anillin actin binding protein                                    | 0.00519        | 0.217                                       |
| APBA1         | amyloid beta precursor protein binding family A member 1         | 0.00391        | 0.224                                       |
| APMAP         | adipocyte plasma membrane associated protein                     | 0.00225        | -0.237                                      |
| ARL6IP6       | ADP ribosylation factor like GTPase 6 interacting protein 6      | 0.00656        | -0.211                                      |
| ATP5MC2P4     | ATP synthase membrane subunit c locus 2 pseudogene 4             | 0.00447        | -0.221                                      |
| ATP6V1E2      | ATPase H <sup>+</sup> transporting V1 subunit E2                 | 0.00133        | -0.248                                      |
| BMP1          | bone morphogenetic protein 1                                     | 0.0102         | 0.200                                       |
| BTNL8         | butyrophilin like 8                                              | 0.00699        | -0.210                                      |
| CAPN5         | calpain 5                                                        | 0.00851        | -0.205                                      |
| CASC15        | cancer susceptibility 15                                         | 0.00797        | 0.207                                       |
| CCDC71L       | coiled-coil domain containing 71 like                            | 0.00991        | -0.201                                      |
| CD9           | CD9 molecule                                                     | 0.0023         | -0.236                                      |
| CDAN1         | codanin 1                                                        | 0.00972        | -0.201                                      |
| CDH7          | cadherin 7                                                       | 0.00242        | -0.235                                      |
| CFD           | complement factor D                                              | 0.00108        | -0.253                                      |
| CHMP4B        | charged multivesicular body protein 4B                           | 0.0094         | -0.202                                      |
| CLEC18A       | C-type lectin domain family 18 member A                          | 0.00829        | -0.206                                      |
| CNNM4         | cyclin and CBS domain divalent metal cation transport mediator 4 | 0.0067         | -0.211                                      |
| CTHRC1        | collagen triple helix repeat containing 1                        | 0.000828       | -0.259                                      |
| CYB561D2      | cytochrome b561 family member D2                                 | 0.00445        | -0.221                                      |
| CYSTM1        | cysteine rich transmembrane module containing 1                  | 0.00506        | -0.218                                      |
| DAB2          | DAB adaptor protein 2                                            | 0.00974        | 0.201                                       |
| DCAF4L1       | DDB1 and CUL4 associated factor 4 like 1                         | 0.00176        | -0.242                                      |
| DCP1B         | decapping mRNA 1B                                                | 0.00486        | -0.219                                      |
| DHRS9         | dehydrogenase/reductase 9                                        | 0.00306        | -0.230                                      |
| DNAJC3-DT     | DNAJC3 divergent transcript                                      | 0.00377        | -0.225                                      |
| DNAL4         | dynein axonemal light chain 4                                    | 0.00692        | -0.210                                      |
| DOC2B         | double C2 domain beta                                            | 0.00133        | 0.249                                       |
| DOLK          | dolichol kinase                                                  | 0.00761        | -0.208                                      |
| DPYD-IT1      | DPYD intronic transcript 1                                       | 0.00466        | -0.220                                      |
| DUSP1         | dual specificity phosphatase 1                                   | 0.00509        | -0.218                                      |

|           |                                                                 |          |        |
|-----------|-----------------------------------------------------------------|----------|--------|
| DYNC1LI1  | dynein cytoplasmic 1 light intermediate chain 1                 | 0.00745  | -0.208 |
| EDC3      | enhancer of mRNA decapping 3                                    | 0.00465  | -0.220 |
| EEF1A1P8  | eukaryotic translation elongation factor 1 alpha 1 pseudogene 8 | 0.0045   | 0.221  |
| EIF1AY    | eukaryotic translation initiation factor 1A Y-linked            | 0.00175  | -0.243 |
| EPB41L2   | erythrocyte membrane protein band 4.1 like 2                    | 0.00602  | 0.214  |
| EPHB4     | EPH receptor B4                                                 | 6.23E-06 | -0.345 |
| FPR2      | formyl peptide receptor 2                                       | 0.00178  | -0.242 |
| FRAT2     | FRAT regulator of WNT signaling pathway 2                       | 0.00879  | -0.204 |
| GNB2      | G protein subunit beta 2                                        | 0.000584 | -0.266 |
| GOLGA7    | golgin A7                                                       | 0.00725  | -0.209 |
| GRTP1     | growth hormone regulated TBC protein 1                          | 0.004    | -0.224 |
| GTF2IP4   | general transcription factor Iii pseudogene 4                   | 0.00578  | -0.215 |
| H1-12P    | H1.12 linker histone, cluster member pseudogene                 | 0.00107  | -0.253 |
| H2BC18    | H2B clustered histone 18                                        | 0.00924  | -0.203 |
| HYAL3     | hyaluronidase 3                                                 | 0.000555 | -0.267 |
| IFNGR2    | interferon gamma receptor 2                                     | 0.00132  | -0.249 |
| IPO13     | importin 13                                                     | 0.0091   | 0.203  |
| ITM2B     | integral membrane protein 2B                                    | 0.0062   | -0.213 |
| JTB       | jumping translocation breakpoint                                | 0.00472  | -0.220 |
| JUNB      | JunB proto-oncogene, AP-1 transcription factor subunit          | 0.00329  | -0.228 |
| KBTBD7    | kelch repeat and BTB domain containing 7                        | 0.00116  | -0.251 |
| KDM5C-IT1 | KDM5C intronic transcript 1                                     | 0.00548  | -0.216 |
| LHFPL6    | LHFPL tetraspan subfamily member 6                              | 0.00458  | 0.220  |
| LOXL1-AS1 | LOXL1 antisense RNA 1                                           | 0.0073   | -0.209 |
| MAX       | MYC associated factor X                                         | 0.0087   | -0.204 |
| MCM4      | minichromosome maintenance complex component 4                  | 0.00078  | 0.260  |
| MSRB1     | methionine sulfoxide reductase B1                               | 0.00735  | -0.209 |
| MTRNR2L6  | MT-RNR2 like 6                                                  | 0.00248  | 0.235  |
| MTUS1     | microtubule associated scaffold protein 1                       | 0.000535 | 0.267  |
| MX1       | MX dynamin like GTPase 1                                        | 0.00754  | 0.208  |
| MYBPC3    | myosin binding protein C3                                       | 0.00943  | -0.202 |
| MYL12B    | myosin light chain 12B                                          | 0.00553  | -0.216 |
| MYPN      | myopalladin                                                     | 0.00129  | 0.249  |
| NAT14     | N-acetyltransferase 14 (putative)                               | 0.0043   | -0.222 |
| NEK7      | NIMA related kinase 7                                           | 0.00276  | -0.232 |
| NEXN      | nexilin F-actin binding protein                                 | 0.00573  | 0.215  |
| NLRP2     | NLR family pyrin domain containing 2                            | 0.00304  | -0.230 |
| NOP10     | NOP10 ribonucleoprotein                                         | 0.00558  | -0.215 |
| OAS2      | 2'-5'-oligoadenylate synthetase 2                               | 0.00572  | 0.215  |
| OAS3      | 2'-5'-oligoadenylate synthetase 3                               | 0.00459  | 0.220  |
| OAT       | ornithine aminotransferase                                      | 0.00344  | -0.227 |
| OSER1     | oxidative stress responsive serine rich 1                       | 0.00223  | -0.237 |
| PCBP1-AS1 | PCBP1 antisense RNA 1                                           | 0.00567  | -0.215 |
| PCBP3     | poly(rC) binding protein 3                                      | 0.00867  | -0.204 |

|           |                                                                      |          |        |
|-----------|----------------------------------------------------------------------|----------|--------|
| PCDHGA8   | protocadherin gamma subfamily A, 8                                   | 0.00678  | -0.211 |
| PGAP1     | post-GPI attachment to proteins inositol deacylase 1                 | 0.00309  | 0.230  |
| PGM2      | phosphoglucomutase 2                                                 | 0.000598 | -0.265 |
| PIGFP2    | phosphatidylinositol glycan anchor biosynthesis class F pseudogene 2 | 0.0043   | 0.222  |
| PIP4K2C   | phosphatidylinositol-5-phosphate 4-kinase type 2 gamma               | 0.00178  | -0.242 |
| PIPSL     | PIP5K1A and PSMD4 like (pseudogene)                                  | 0.00441  | -0.221 |
| PLGLB1    | plasminogen like B2                                                  | 0.00157  | -0.245 |
| PLP2      | proteolipid protein 2                                                | 0.00857  | -0.205 |
| POLB      | DNA polymerase beta                                                  | 0.00255  | -0.234 |
| POLQ      | DNA polymerase theta                                                 | 0.00602  | 0.214  |
| PPP1R3F   | protein phosphatase 1 regulatory subunit 3F                          | 0.0066   | -0.211 |
| PPTC7     | protein phosphatase targeting COQ7                                   | 0.0064   | -0.212 |
| PROK2     | prokineticin 2                                                       | 0.00522  | -0.217 |
| PRPH2     | peripherin 2                                                         | 0.00743  | -0.208 |
| PRRG1     | proline rich and Gla domain 1                                        | 0.000389 | 0.274  |
| PRRG4     | proline rich and Gla domain 4                                        | 0.00921  | -0.203 |
| PSMA8     | proteasome 20S subunit alpha 8                                       | 0.00625  | -0.213 |
| PSMB3     | proteasome 20S subunit beta 3                                        | 0.0017   | -0.243 |
| PSMD8P1   | proteasome 26S subunit, non-ATPase, 8 pseudogene 1                   | 0.00425  | -0.222 |
| PTK2      | protein tyrosine kinase 2                                            | 0.00506  | 0.218  |
| QPCT      | glutamyl-peptide cyclotransferase                                    | 0.00906  | -0.203 |
| RAB11A    | RAB11A, member RAS oncogene family                                   | 0.00548  | -0.216 |
| RAB2A     | RAB2A, member RAS oncogene family                                    | 0.0101   | -0.200 |
| RARRES1   | retinoic acid receptor responder 1                                   | 0.0102   | -0.200 |
| RDH10-AS1 | RDH10 antisense RNA 1                                                | 0.0015   | -0.246 |
| RGL4      | ral guanine nucleotide dissociation stimulator like 4                | 0.00215  | -0.238 |
| RGS14     | regulator of G protein signaling 14                                  | 0.000494 | -0.269 |
| RHOB      | ras homolog family member B                                          | 0.000341 | -0.276 |
| RHOQP3    | ras homolog family member Q pseudogene 3                             | 0.00575  | -0.215 |
| RRAGC     | Ras related GTP binding C                                            | 0.00371  | -0.225 |
| S100P     | S100 calcium binding protein P                                       | 0.00531  | -0.217 |
| SAMD13    | sterile alpha motif domain containing 13                             | 0.00727  | 0.209  |
| SCN9A     | sodium voltage-gated channel alpha subunit 9                         | 0.00498  | -0.218 |
| SCNN1A    | sodium channel epithelial 1 subunit alpha                            | 0.0007   | -0.262 |
| SDCBP     | syndecan binding protein                                             | 0.00295  | -0.231 |
| SDHAF4    | succinate dehydrogenase complex assembly factor 4                    | 0.00456  | -0.220 |
| SERTAD3   | SERTA domain containing 3                                            | 0.00473  | -0.220 |
| SIGLEC1   | sialic acid binding Ig like lectin 1                                 | 0.00292  | 0.231  |
| SLC19A1   | solute carrier family 19 member 1                                    | 0.00719  | -0.209 |
| SND1-IT1  | SND1 intronic transcript 1                                           | 0.00599  | -0.214 |
| SPACA6    | sperm acrosome associated 6                                          | 0.00244  | -0.235 |
| SRXN1     | sulfiredoxin 1                                                       | 0.00352  | -0.227 |
| ST20      | suppressor of tumorigenicity 20                                      | 0.00967  | -0.202 |
| STAC3     | SH3 and cysteine rich domain 3                                       | 0.00761  | 0.208  |

|            |                                                                                     |          |        |
|------------|-------------------------------------------------------------------------------------|----------|--------|
| STOX2      | storkhead box 2                                                                     | 0.00934  | 0.202  |
| TBC1D20    | TBC1 domain family member 20                                                        | 0.00904  | -0.203 |
| TM2D3      | TM2 domain containing 3                                                             | 0.00486  | -0.219 |
| TM6SF1     | transmembrane 6 superfamily member 1                                                | 0.000551 | -0.267 |
| TMEM154    | transmembrane protein 154                                                           | 0.00149  | -0.246 |
| TMEM43     | transmembrane protein 43                                                            | 0.000831 | -0.259 |
| TMEM69     | transmembrane protein 69                                                            | 0.00075  | -0.261 |
| TOPORS     | TOP1 binding arginine/serine rich protein, E3 ubiquitin ligase                      | 0.0087   | -0.204 |
| TRADD      | TNFRSF1A associated via death domain                                                | 0.00284  | -0.232 |
| TRPC4AP    | transient receptor potential cation channel subfamily C member 4 associated protein | 0.00385  | -0.224 |
| TSPAN2     | tetraspanin 2                                                                       | 0.000682 | -0.263 |
| TTC9       | tetratricopeptide repeat domain 9                                                   | 0.00986  | -0.201 |
| UBE2B      | ubiquitin conjugating enzyme E2 B                                                   | 0.00274  | -0.232 |
| UTY        | ubiquitously transcribed tetratricopeptide repeat containing, Y-linked              | 0.00595  | -0.214 |
| VLDLR      | very low density lipoprotein receptor                                               | 0.00285  | -0.232 |
| VSIG8      | V-set and immunoglobulin domain containing 8                                        | 0.00731  | -0.209 |
| WLS        | Wnt ligand secretion mediator                                                       | 0.00716  | -0.209 |
| ZBED3-AS1  | ZBED3 antisense RNA 1                                                               | 0.00895  | -0.204 |
| ZNF180     | zinc finger protein 180                                                             | 0.00613  | -0.213 |
| ZNF404     | zinc finger protein 404                                                             | 0.00688  | 0.210  |
| ZNF561-AS1 | ZNF561 antisense RNA 1 (head to head)                                               | 0.00796  | -0.207 |
